# Supplementary material for: Multi-omics insights into the effects of Allium mongolicum Regel flavonoids on growth, antioxidant capacity, and immune regulation in Saanen dairy male goats
Source: Research Square preprint supplement (doi:10.21203/rs.3.rs-7997729/v1), 2025-11-17
Supplement: Supplementary file 1 [file b46cce7c5724b747c8a8c4c6.docx]

**Attached file**

**Supplementary Table**

**Supplementary Table 1** Yield of flavonoids from dried *Allium mongolicum* Regel leaf and a comparison of the relative contents of main active compound (dry matter basis).

| Main active compound | Molecular mass | Flavonoids from dried *Allium mongolicum* Regel leaf |
| --- | --- | --- |
| Flavone |
| Crysoeriol O-glucuronic acid | 476.10 | 26900 |
| Apigenin | 270.05 | 665000 |
| Chrysoeriol 7-O-hexoside | 462.20 | 108000 |
| Tricin 7-O-hexoside | 492.10 | 319000 |
| Chrysoeriol | 300.06 | 639000 |
| Velutin | 314.08 | 48200 |
| Flavonol |
| Isorhamnetin | 316.06 | 4570000 |
| Rhamnetin(7-O-methxyl quercetin) | 316.06 | 72500 |
| Laricitrin | 332.05 | 27800 |
| Quercetin | 302.04 | 4760000 |
| Kumatakenin | 314.08 | 63100 |
| Morin | 302.04 | 40700000 |
| Flavanone |
| Homoeriodictyol | 302.28 | 2510000 |
| Isosakuranetin(4'-Methylnaringenin) | 286.08 | 102000 |
| Hesperetin | 302.08 | 62400 |
| Flavone C-glycosides |
| Luteolin 6-C-glucoside | 448.10 | 189000 |
| Chrysoeriol 8-C-hexoside | 462.10 | 27800 |
| Isoflavone |
| Biochanin A | 284.07 | 62400 |
| Prunetin | 284.07 | 78000 |
| Terpenoids |  |  |
| Phytocassane C | 318.10 | 108000 |
| Organic acids |
| 2-Hydroxybutanoic acid | 104.05 | 602000 |
| α-Hydroxyisobutyric acid | 104.05 | 147000 |
| (R)-lipoic acid | 206.04 | 4330 |
| Rosmarinic acid | 360.30 | 4930 |
| 2-Hydroxyisocaproic acid | 132.08 | 1520000 |
| D-Pantothenic dcid | 476.17 | 11000 |
| Phenolamides |
| N-p-Coumaroyl hydroxyagmatine | 292.20 | 31900 |
| Hydroxycinnamoyl derivatives |
| Caffeic aldehyde | 164.10 | 182000 |
| Syringaldehyde | 182.10 | 34400 |
| Alkaloids |
| Isoquinoline | 129.10 | 12800 |
| Phytohormones |
| Gibberellin A20 | 332.16 | 1160 |
| N6-Isopentenyladenine | 203.12 | 6760 |
| Methyl indole-3-acetate | 189.08 | 10800 |
| Indole 3-acetic acid | 175.06 | 134000 |
| Anthocyanins |
| Cyanidin 3-O-rutinoside | 595.00 | 60700 |
| Alcohols and polyols |
| DL-threitol | 122.06 | 134000 |

**Supplementary Table 2** Composition and nutrient levels of the basal diet (air-dry basis /%)

| Items | Fattening stages | | |
| --- | --- | --- | --- |
| **Phase I（Day 1 to 30）** | **Phase II（Day 31 to 60）** | **Phase III（Day 61 to 124）** |
| Ingredients, % of DM |  |  |  |
| Corn | 25.00 | 35.00 | 35.00 |
| Soybean meal | 9.00 | 9.00 | 17.00 |
| Corn silage | 20.00 | 18.00 | 11.00 |
| Soybean straw | 23.00 | 17.00 | 9.00 |
| Oats | 13.00 | 11.00 | 7.00 |
| Cottonseed meal | 9.00 | 9.00 | 12.00 |
| Rapeseed meal | - | - | 8.00 |
| Stone powder | 0.75 | 0.75 | 0.75 |
| Premix1 | 0.25 | 0.25 | 0.25 |
| Total | 100.00 | 100.00 | 100.00 |
| Nutrient levels |  |  |  |
| Metabolizable energy, MJ/kg2 | 10.13 | 10.29 | 11.13 |
| Ash | 10.90 | 10.08 | 9.10 |
| Crude protein | 16.28 | 15.23 | 16.02 |
| Ether extract | 3.00 | 3.30 | 3.10 |
| Neutral detergent fiber | 41.20 | 39.90 | 40.02 |
| Acid detergent fiber | 25.80 | 24.80 | 25.20 |
| Ca | 1.19 | 1.30 | 0.86 |
| P | 0.39 | 0.38 | 0.36 |

Note: Abbreviations: ME = metabolizable energy, CP = crude protein, EE = ether extract, neutral detergent fiber, acid detergent fiber, Ca = calcium, P = phosphorus.

1 Each kilogram of the premix contains: 550 kIU of vitamin A, 75 kIU of vitamin D3, 6 kIU of vitamin E, 1600 mg of Cu, 9400 mg of Fe, 10400 mg of Mn, 8000 mg of Zn, 200 mg of I, 60 mg of Se, and 72 mg of Co.

2 The metabolizable energy values were calculated according to the Ministry of Agriculture of P. R. China (2021)-Nutrient requirements of meat-type sheep and goat (NY/T816-2021).

**Supplemental Figure**


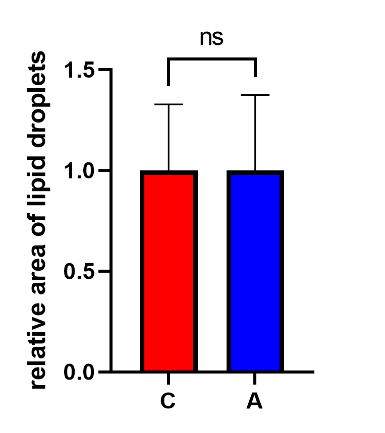


**Supplemental Figure 1** Oil Red O staining-based visualization and quantitative analysis of the relative area of Liver lipid droplets in Saanen dairy goats.


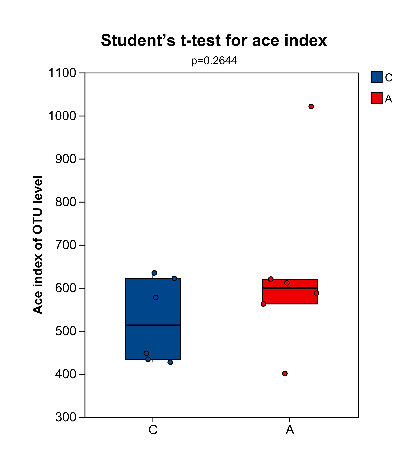


a


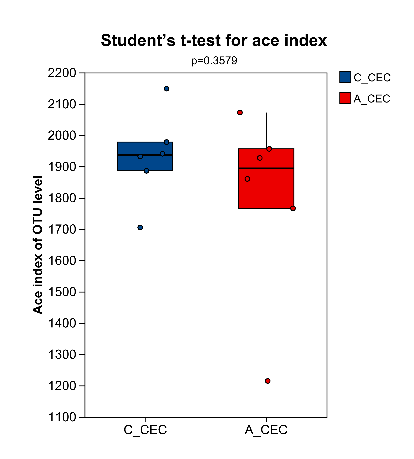


b


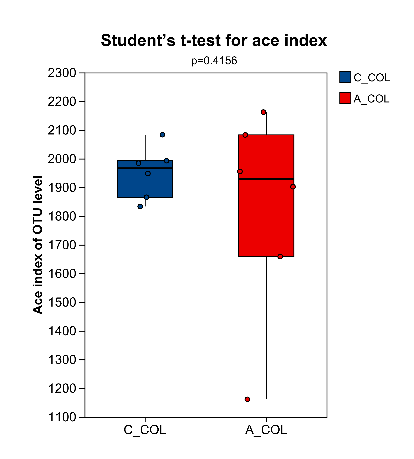


c

**Supplemental Figure 2a-c** Analysis of the effect of dietary AMRF supplementation on the Alpha diversity (Ace index) of microbial communities in different intestinal segments (**a**: rumen, **b**: cecum, **c**: colon) in Saanen dairy goats.


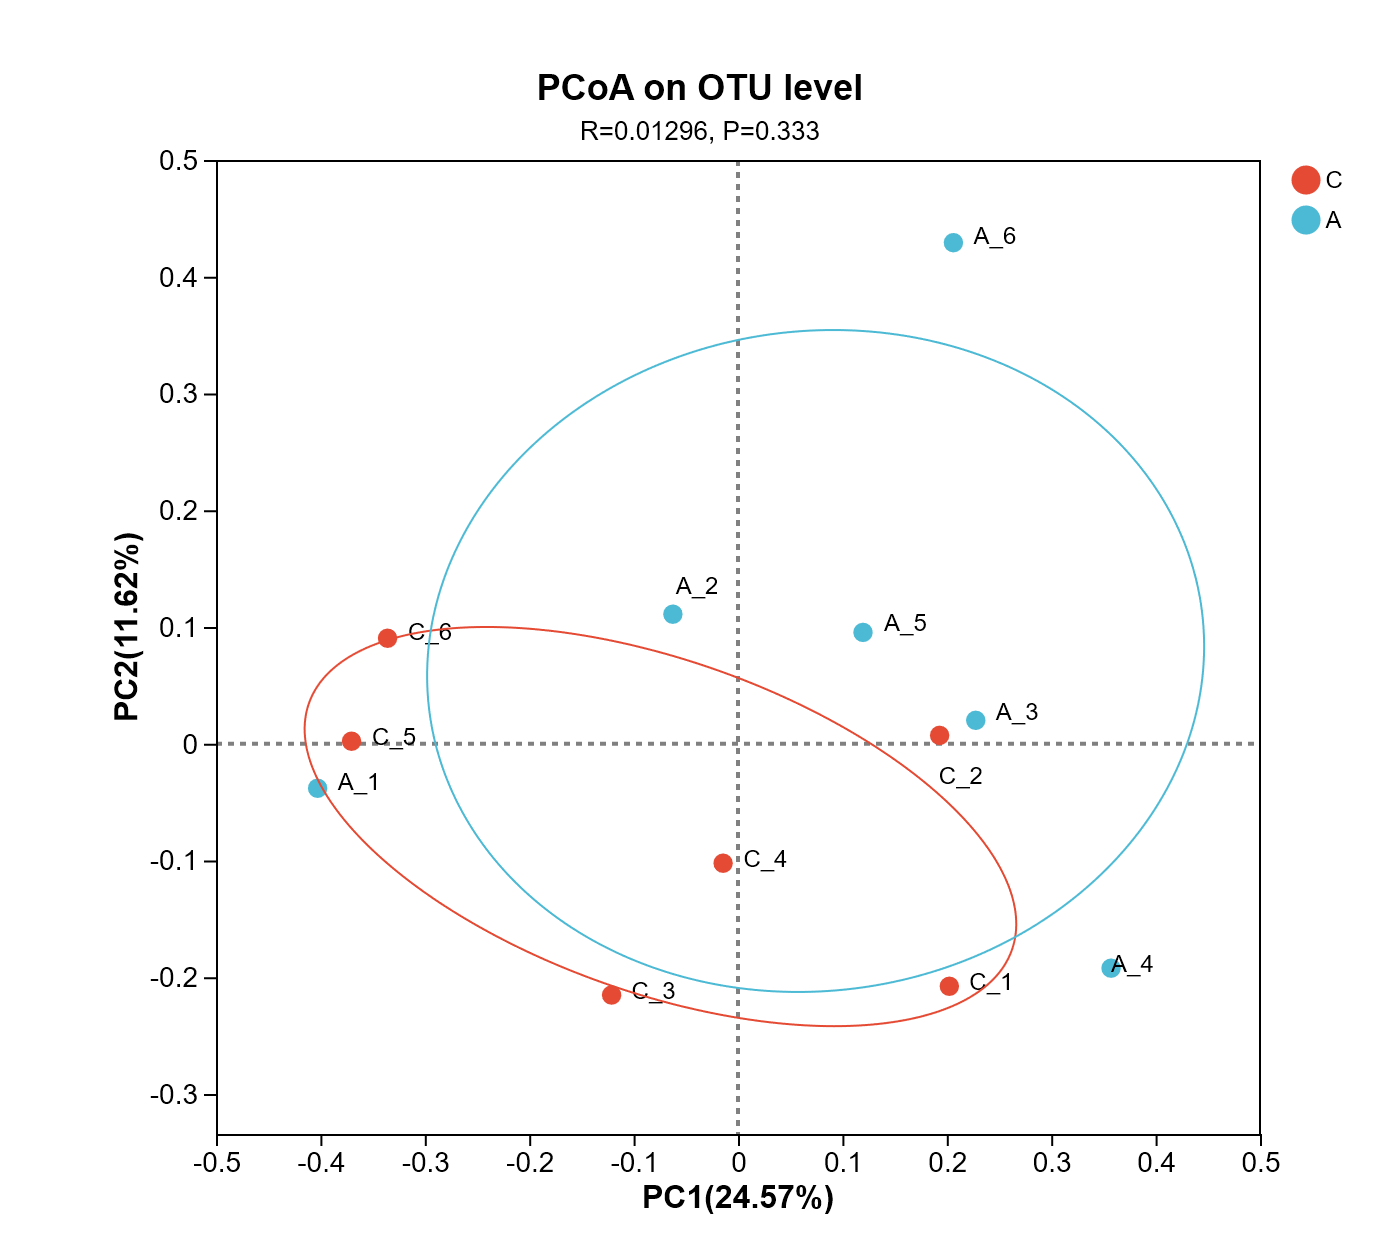


a


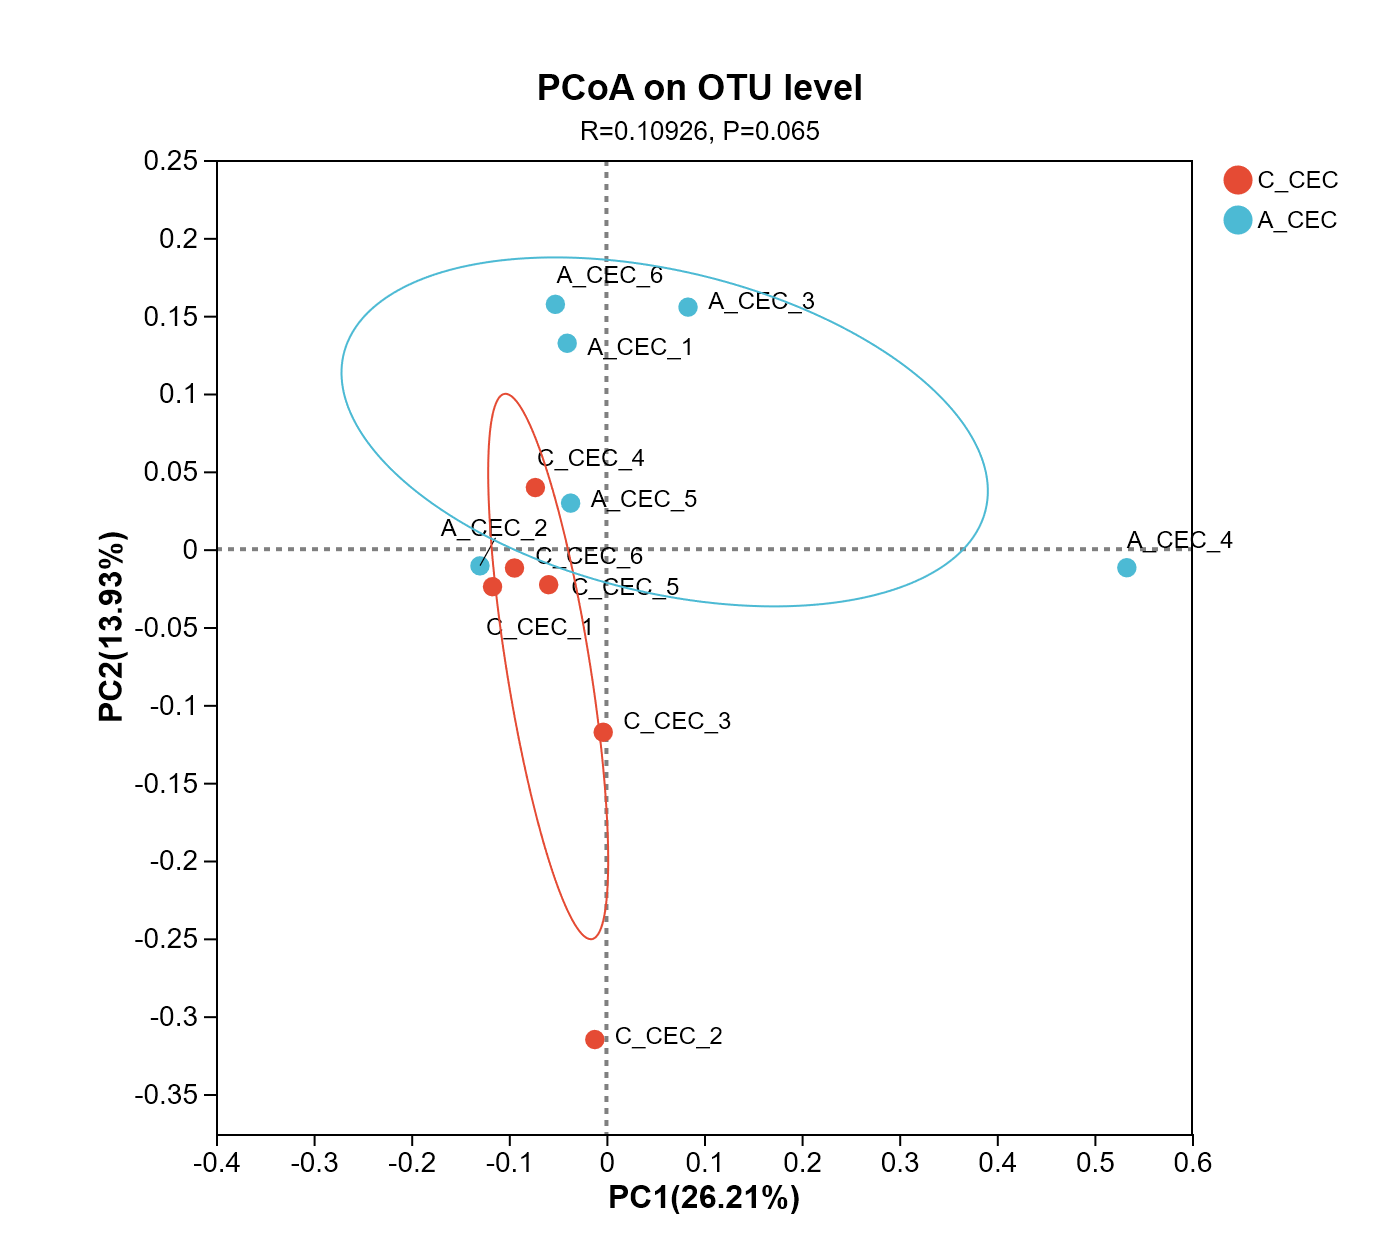


b


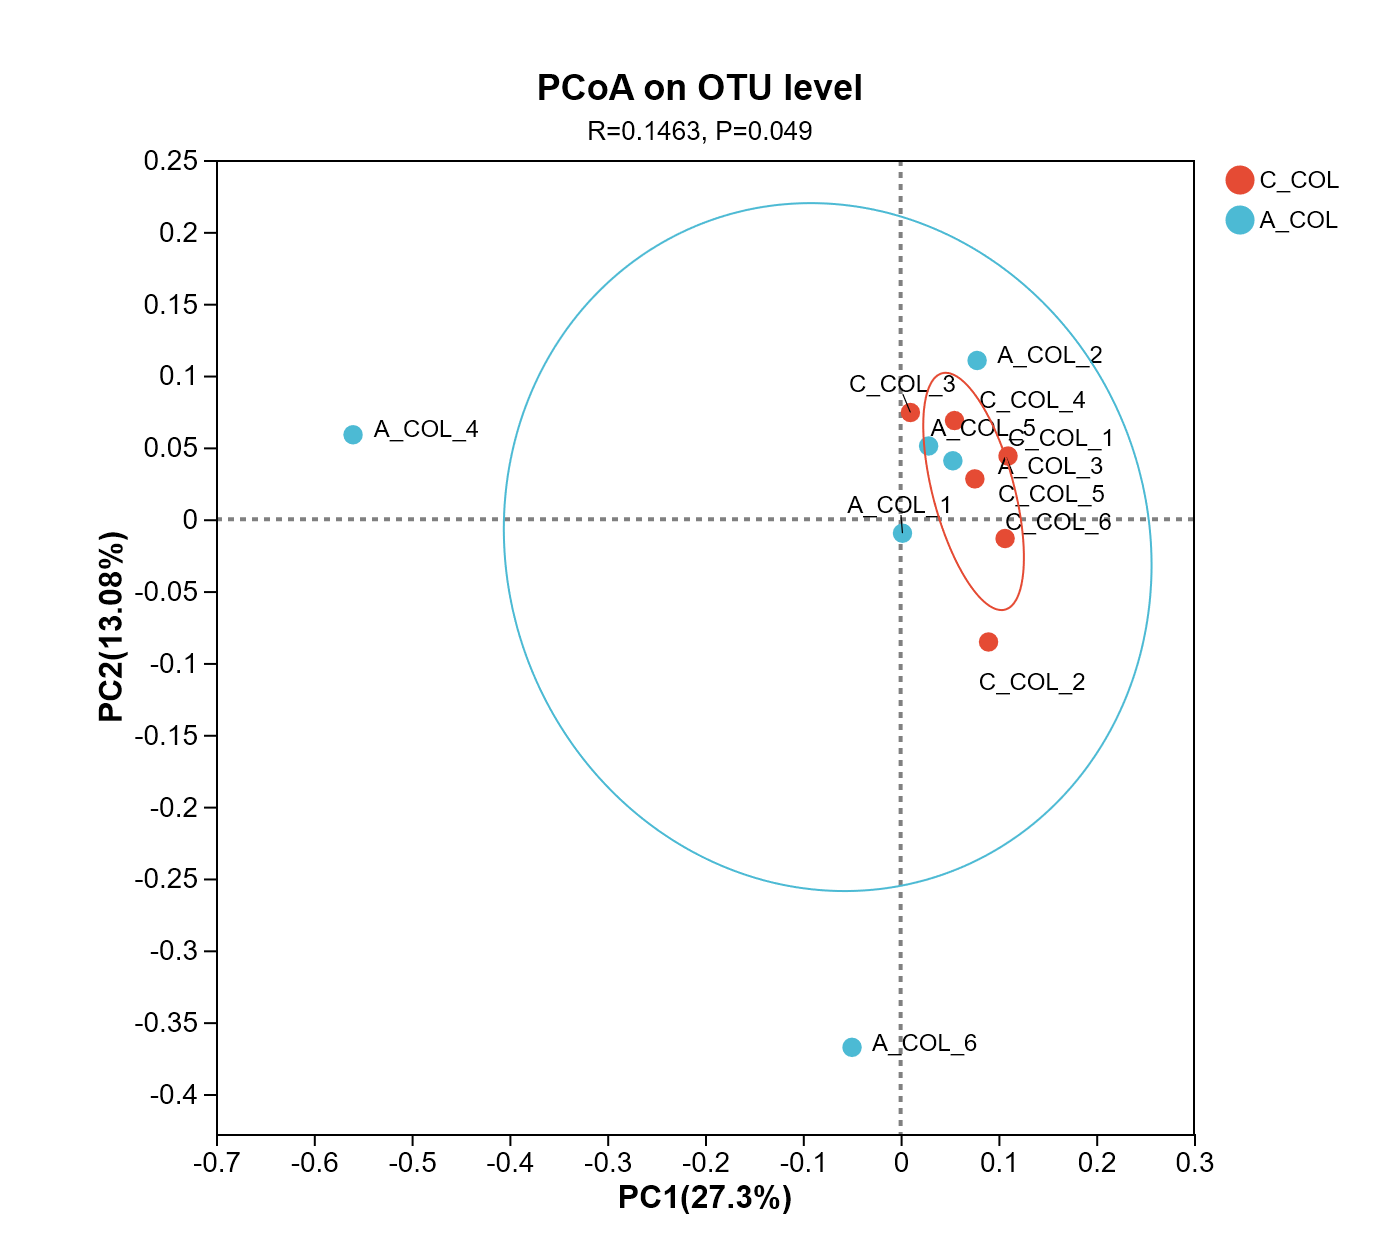


c

**Supplemental Figure 3a-c** Principal Coordinate Analysis (P-CoA) of Beta diversity of microbial communities in different intestinal segments (**a**: rumen, **b**: cecum, **c**: colon) in Saanen dairy goats at the OTU (Operational Taxonomic Unit) level.
